# Supplementary material
Source: Springer Nature journal article supplement (https://www.springermedizin.de/resource/supplementary/12877_2011_611_MOESM3_ESM.pdf/9439974)
Supplement: MOESM3 [file 9439974]

Acutely or electively admitted elderly patients (65 years or older)

Triage 1  
ISAR-HP  $\geq 1$

**Patients excluded:**

- score of 0 on ISAR-HP
- too ill /terminally ill
- Dutch language problems
- not present at ward /asleep
- cognitively unable

**Elderly at risk**  
(Informed consent for study asked)

**Patient refusals to participate**

N = 900 elderly  
Included in study as **control group**

T0 (baseline), T1 (3 month follow up), T2 (12 month follow up) measurements
